1 **Reversing an extracellular electron transfer pathway for electrode-driven NADH**  
2 **generation**

3  
4 Nicholas M. Tefft<sup>1</sup> and Michaela A. TerAvest<sup>1\*</sup>

5 <sup>1</sup>Department of Biochemistry and Molecular Biology, Michigan State University, East Lansing, MI, USA

6 \*corresponding author

7 Address: 603 Wilson Rd., East Lansing, MI, 48823 Email: [teraves2@msu.edu](mailto:teraves2@msu.edu)

8

9

10 **Abstract**

11 Microbial electrosynthesis is an emerging technology with the potential to simultaneously store  
12 renewably generated energy, fix carbon dioxide, and produce high-value organic compounds.  
13 However, limited understanding of the route of electrons into the cell remains an obstacle to  
14 developing a robust microbial electrosynthesis platform. To address this challenge, we  
15 engineered an inward electron transfer pathway in *Shewanella oneidensis* MR-1. The pathway  
16 uses native Mtr proteins to transfer electrons from an electrode to the inner membrane quinone  
17 pool. Subsequently, electrons are transferred from quinones to NAD<sup>+</sup> by native NADH  
18 dehydrogenases. This reverse functioning of NADH dehydrogenases is thermodynamically  
19 unfavorable, therefore we have added a light-driven proton pump (proteorhodopsin) to generate  
20 proton-motive force to drive this activity. Finally, we use reduction of acetoin to 2,3-butanediol  
21 via a heterologous butanediol dehydrogenase (Bdh) as an electron sink. Bdh is an NADH-  
22 dependent enzyme, therefore, observation of acetoin reduction supports our hypothesis that  
23 cathodic electrons are transferred to intracellular NAD<sup>+</sup>. Multiple lines of evidence indicate  
24 proper functioning of the engineered electrosynthesis system: electron flux from the cathode is  
25 influenced by both light and acetoin availability; and 2,3-butanediol production is highest when  
26 both light and a poised electrode are present. Using a hydrogenase-deficient *S. oneidensis*  
27 background strain resulted in a stronger correlation between electron transfer and 2,3-butanediol  
28 production, suggesting that hydrogen production is an off-target electron sink in the wild-type

29 background. This system represents a promising genetically engineered microbial  
30 electrosynthesis platform and will enable a new focus on synthesis of specific compounds using  
31 electrical energy.

## 32 **Introduction**

33 Microbial electrosynthesis is a technology that utilizes microbes for production of useful  
34 chemicals using carbon dioxide, water, and electricity as feedstocks (1). While most microbial  
35 electrosynthesis efforts to date have targeted fuel production, other possible applications include  
36 production of platform chemicals or bioplastics (2). With pressure to develop sustainable  
37 production systems, microbial electrosynthesis is an attractive technology to simultaneously  
38 produce valuable products and store electricity generated by wind and solar technologies. Initial  
39 efforts have focused on three primary platforms for microbial electrosynthesis: pure cultures of  
40 acetogens (3, 4); undefined mixed cultures (5, 6); and electron shuttles paired with model  
41 bacterial strains (7, 8). While these approaches have demonstrated proof-of-concept, significant  
42 improvements in product yield and product spectrum are necessary to make microbial  
43 electrosynthesis economically viable.

44 Pure culture microbial electrosynthesis systems have been developed in an effort to  
45 understand the mechanism of electron uptake from a cathode. These systems primarily utilize  
46 acetogenic bacteria because they are naturally capable of converting carbon dioxide into acetate  
47 using hydrogen or other inorganic electron donors (9, 10). Multiple reports show that acetogens  
48 are capable of using an electrode in place of native electron donors (3, 4). While acetate is a  
49 relatively low value product, genetic modification may yield strains capable of producing other  
50 compounds through electrosynthesis (11). While this is a promising approach, significant  
51 challenges to acetogen engineering remain, and further developments are necessary (11, 12). An

52 alternative approach that may yield specific products is to utilize chemical electron mediators to  
53 transfer electrons from an electrode into existing model organisms. This approach has been  
54 successful in multiple organisms to generate products such as succinate and ethanol (7, 13–15).  
55 However, the cost of the mediator and downstream separations likely make this approach too  
56 costly for industrial scale up.

57 Mixed culture approaches to microbial electrosynthesis have also borne success, due to  
58 their ability to generate a range of products without genetic modification. Early efforts in this  
59 area have primarily generated acetate, with adjustments to operating conditions driving increased  
60 yield (16–18). However, other molecules can also be produced, including butyrate, butanol, and  
61 ethanol (5, 19). Selective enrichment of the community is important to improve yields and  
62 product specificity (6, 17). While evidence that higher value products are attainable increases the  
63 attractiveness of electrosynthesis using undefined mixed cultures, off-target production remains  
64 problematic. For example, increased abundance of methanogens over time has posed difficulties  
65 for long term experiments due to decreased acetate titers and increased methane production (6,  
66 20). Further, a mixed community cannot be engineered to produce a specific high-value  
67 compound with any current technology.

68 Overall, optimization of existing approaches to microbial electrosynthesis has been  
69 hampered by poorly defined interactions between bacteria and cathode electrodes. In most cases,  
70 the mechanism of electron transfer is unknown, although in mixed culture systems, H<sub>2</sub> is  
71 recognized as a major electron carrier between the electrode and microbes (5). For pure cultures,  
72 direct electron transfer has been proposed, but not proven (3, 4). Similarly, specific mechanisms  
73 of electron transfer via chemical mediators are only beginning to be investigated (13). In  
74 contrast, transmembrane electron transfer is much better understood between dissimilatory metal

75 reducing bacteria and anode electrodes. *Shewanella oneidensis* MR-1 is particularly well  
76 understood and the structure of the Mtr pathway and its function in transferring electrons to the  
77 outer surface of the cell have been thoroughly described in the last two decades (21–28).

78 The well understood electron transfer mechanism of *Shewanella* makes it an excellent  
79 candidate to engineer a microbial electrosynthesis system from the ground up using synthetic  
80 biology tools. Initial steps to explore the use of *S. oneidensis* MR-1 for microbial  
81 electrosynthesis have demonstrated reverse electron transfer through the Mtr pathway. Ross et al.  
82 (29) showed electron transfer from a cathode to *S. oneidensis* MR-1 with fumarate as an electron  
83 sink, indicating that the Mtr pathway can transfer electrons from a cathode to respiratory  
84 quinones. More recent work by Rowe et al. (30) has demonstrated that *S. oneidensis* MR-1 can  
85 also catalyze electron transfer from a cathode to oxygen through the Mtr pathway and the  
86 quinone pool.

87 While previous work has demonstrated the ability to generate reduced quinones via a  
88 cathode, this is not sufficient to power intracellular reduction reactions. Electrons in the quinone  
89 pool have too positive a redox potential to be spontaneously transferred to  $\text{NAD}^+$  (ca.  $-80 \text{ mV}_{\text{SHE}}$   
90 for menaquinone:menaquinol vs. ca.  $-320 \text{ mV}$  for  $\text{NAD}^+:\text{NADH}$ ) and have only been transferred  
91 to electron acceptors with a more positive redox potential, such as fumarate (ca.  $+30 \text{ mV}_{\text{SHE}}$ ).  
92 Electrons should ideally be transferred to an intracellular, lower potential electron carrier to be  
93 useful for electrosynthesis. NADH is a promising intracellular electron carrier to target because it  
94 is involved in many metabolic reactions and is relatively accessible from the quinone pool  
95 through NADH dehydrogenases. Under typical conditions, NADH dehydrogenases catalyze the  
96 favorable transfer of electrons from NADH to quinones and conserve energy as a proton-motive  
97 force (31). However, NADH dehydrogenases may also catalyze the reverse redox reaction,

98 utilizing proton-motive force as an energy source, as observed in purple photosynthetic bacteria  
99 (32).

100 Based on previous work and our knowledge of *S. oneidensis* MR-1 metabolism, we  
101 hypothesized that NADH dehydrogenases could be driven in reverse to transfer electrode-  
102 derived electrons into the cell. Therefore, we engineered a system relying on the native Mtr  
103 pathway and NADH dehydrogenases to catalyze the electron transfer steps and using a  
104 heterologous light-driven proton pump to generate proton motive force (PMF) to drive NADH  
105 dehydrogenases in reverse (**Figure 1**). We expressed butanediol dehydrogenase and provided its  
106 substrate, acetoin, to provide an electron sink and a mechanism to track NADH generation. This  
107 system represents a generalizable platform to use cathodes to drive NADH-dependent reductions  
108 in *S. oneidensis* MR-1. Further development of this platform could lead to a new capability to  
109 generate specific, high-value compounds using electricity and carbon dioxide as feedstocks.

110

## 111 **Results and Discussion**

### 112 Development of modified *S. oneidensis* strains

113 Genes encoding proteorhodopsin (PR) and butanediol dehydrogenase (Bdh) were cloned into a  
114 medium copy plasmid with a constitutive promoter and conjugated into *S. oneidensis* (both WT  
115 and a strain lacking hydrogenases;  $\DeltahyaB\DeltahyaA$ ) (**Table 1**). A FLAG tag was added to the C-  
116 terminus of each protein to facilitate detection by Western blot. Both proteins were detectable in  
117 cleared lysates using an anti-FLAG antibody, confirming successful expression (**Figure S1**). To  
118 confirm function of Bdh, the modified strain was grown aerobically in the presence of 15 mM  
119 exogenous acetoin in LB. Accumulation of 2,3-butanediol was observed by HPLC, indicating

120 that the expressed Bdh is functional (**Figure S2**). Function of PR expressed from a similar  
121 plasmid was previously demonstrated in *S. oneidensis* MR-1 (33, 34).

122

### 123 Light and current drive a target reduction reaction in modified *S. oneidensis*

124 To determine the capability of the engineered cells to accept electrons from a cathode, the strain  
125 lacking hydrogenases and carrying a plasmid with PR and Bdh was pre-grown and inoculated  
126 into bioelectrochemical systems at a final density of  $OD_{600} = 0.17$ . This mutant strain was used to  
127 ensure that  $H_2$  did not act as a mediator between cells and the electrode. This mutant was  
128 previously shown to lack the ability to produce or consume  $H_2$  (35, 36). To minimize the  
129 influence of organic carbon as an electron donor, the bioelectrochemical systems initially  
130 contained oxygen (ambient) and the working electrode was set at an anodic potential (+0.4  
131  $V_{SHE}$ ). This was done to decrease the availability of organic carbon by oxidizing stored organic  
132 material and media components carried over during inoculation. After 6 hours, the working  
133 electrode was switched to a cathodic potential (-0.3  $V_{SHE}$ ), and  $N_2$  sparging was used to remove  
134 oxygen from the bioreactors. Each bioelectrochemical system was equipped with green LED  
135 lights around the working electrode chamber to drive proton pumping by PR (**Figure S3**). After  
136 switching to the working electrode to a cathodic potential, a stable cathodic current between -5  
137 and -8  $\mu A$  was observed. After 16 hours, an anoxic acetoin solution was injected into each  
138 bioreactor to a final concentration of 10 mM. After acetoin injection, an increase of -12 to -18  
139  $\mu A$  was observed in all bioelectrochemical systems (**Figure 2**). Note that for cathodic current, a  
140 greater negative current represents a greater amount of electron transfer.

141 To determine the influence of proton pumping on electron uptake, we compared cells  
142 with and without functional PR by pre-growing the strain with or without the essential PR

143 cofactor, all-*trans*-retinal. We refer to PR with retinal as holo-PR and PR without retinal as apo-  
144 PR. Cathodic current was significantly higher, ( $p=0.03$ ) in systems with holo-PR (**Figure 3**). We  
145 confirmed that the increased current was due to PR activity by turning off the LED lights  
146 attached to the bioreactor. When the lights were turned off, cathodic current generated by cells  
147 with holo-PR decreased, while cells with apo-PR were unaffected (**Figure 3**). This supports the  
148 model that the effect of light is dependent on functional PR; if the effect of light was due to  
149 heating or interaction of light with native components, we would expect cells with apo-PR to  
150 have a similar response to cells with holo-PR. The dependence of current on holo-PR and light  
151 supports our hypothesis that enhanced PMF generation by PR promotes electron uptake by the  
152 modified strain.

153         During the same experiment, we also measured 2,3-butanediol accumulation to determine  
154 whether cathodic electrons were directed toward the target reaction, acetoin reduction. As with  
155 current, 2,3-butanediol accumulation was greater in the bioelectrochemical systems with holo-PR  
156 (**Figure 4**). Based on the total charge transfer over the course of 6 days, accumulation of  $0.17 \pm$   
157  $0.02$  mM 2,3-butanediol was expected by the end of the experiment. Accumulation of  $0.19 \pm$   
158  $0.01$  mM 2,3-butanediol was actually observed. The experiment was repeated using the same  
159 conditions, with the exception that the electrode was disconnected from the potentiostat. This  
160 experiment confirmed that acetoin reduction was driven by the electrode (**Figure 4**). Indeed, 2,3-  
161 butanediol production was significantly reduced when the electrode was not poised ( $p=0.01$ ), and  
162 accumulation of only  $0.13 \pm 0.00$  mM was observed. Based on our observations,  $0.06$  mM of the  
163 2,3-butanediol (32% of total production) was generated through the electrode-dependent process.  
164 We hypothesize that 2,3-butanediol was not completely eliminated when the electrode was not  
165 poised because remaining organic carbon from the inoculum could be oxidized to generate the

166 NADH needed for acetoin reduction. Although we attempted to remove as much organic carbon  
167 from the experiment as possible, some cells may have lysed during the washing and inoculation  
168 process, thus providing organics to the surviving cells.

169 To determine whether acetoin reduction (as an electron sink) was necessary for inward  
170 electron transfer, we also performed experiments with strains lacking *bdh*. When Bdh was not  
171 expressed, no 2,3-butanediol was detectable in the bioreactors after 6 days, and cathodic current  
172 was significantly reduced, ( $p=0.02$ ). The strain without Bdh generated ca.  $-11 \mu\text{A}$  when holo-PR  
173 was present (**Figure 5**), representing a ca. 32% reduction in electron transfer compared to the  
174 strain with Bdh. This indicates that full activity of the inward electron transfer system is  
175 dependent on acetoin reduction, although there is also some Bdh-independent electron transfer.  
176 This experiment also allows us to refine our comparisons between charge transfer and 2,3-  
177 butanediol accumulation. By subtracting the total charge transfer catalyzed by the strain without  
178 Bdh from the strain with Bdh, we can calculate the amount of charge transfer that is Bdh-  
179 dependent. We calculate that 0.03 mM of 2,3-butanediol accumulation is expected based on the  
180 amount of Bdh-dependent electron transfer. This amount of charge transfer agrees well with the  
181 0.06 mM of electrode-dependent 2,3-butanediol accumulation that we observed.

182 Electron uptake by the strain without Bdh was light-dependent when holo-PR was  
183 present, indicating that the Bdh-independent process requires PMF generation. This may indicate  
184 that the Bdh-independent process also relies on reverse activity of NADH dehydrogenases,  
185 although we do not yet know the eventual fate of electrons transferred to the cells without Bdh.  
186 No other typical metabolic byproducts of *S. oneidensis* MR-1 (e.g., acetate, formate) were  
187 detectable by our HPLC analysis.

188



189 Hydrogen is an electron sink for inward electron transfer

190 A common question in previous work on microbial electrosynthesis is whether H<sub>2</sub> mediates  
191 electron transfer, because it can be produced abiotically at the cathode (37). Because small  
192 amounts of hydrogen are difficult to measure and may be scavenged quickly by cells on the  
193 electrode, it has been challenging to rule out hydrogen as a mediator. We have attempted to do so  
194 using an approach similar to Deutzmann et al. (38), i.e., by using a hydrogenase mutant strain.  
195 The strain we used does not have the ability to use molecular hydrogen as an electron source or  
196 sink (35, 36, 39). To determine whether a hydrogen mediated pathway would function when  
197 hydrogenases were present, we also performed the experiments described above in a wild-type  
198 background. (Note: these experiments were performed without the initial oxic/anodic step, see  
199 Methods for details.) When hydrogenase activity was present, overall current increased while  
200 2,3-butanediol accumulation decreased (**Figure 6**). This indicates that rather than acting as a  
201 mediator, H<sub>2</sub> was an electron sink for *S. oneidensis* on the cathode. If hydrogen acted as a  
202 mediator in this system, we would expect a simultaneous increase in both current and 2,3-  
203 butanediol when hydrogenases were present. Our results indicate that cells with hydrogenases  
204 generated H<sub>2</sub> and that when the pathway to hydrogen was cut off, electrons were directed more  
205 efficiently toward acetoin reduction.

206

207 Comparison with previous work

208 Our results represent an advance in the field of microbial electrosynthesis because we have  
209 engineered a pathway to generate intracellular reducing power with a detailed understanding of  
210 the electron transfer mechanism. The transmembrane electron conduit connecting the quinol pool  
211 to electrodes has been very well characterized (21–23, 28, 40) and is known to be reversible (29,

212 41). We hypothesized that we could take inward electron transfer in *S. oneidensis* MR-1 one step  
213 further by utilizing PMF to overcome the thermodynamic barrier of the quinol:NAD<sup>+</sup> reduction  
214 and an excess of electron sink (Bdh/acetoin) to avoid over reduction of the NAD<sup>+</sup>:NADH pool.  
215 The results presented here support that hypothesis; we have shown that electron transfer to the  
216 target reaction is dependent on the electrode and on each of the modifications made to the strain.  
217 Further, the target reaction is NADH-dependent, indicating that we have successfully connected  
218 the electrode to the intracellular NADH pool.

219 While the system described here is one of the best understood inward electron transfer  
220 demonstrations to date, there is still more to learn. One critical knowledge gap is exactly how  
221 electrons are transferred from the quinol pool to NADH. The *S. oneidensis* MR-1 genome  
222 encodes four NADH:quinone oxidoreductases and any of them could be involved in inward  
223 electron transfer (42, 43). However, because we have observed dependence of inward electron  
224 transfer on PMF, we hypothesize that the proton-coupled NADH dehydrogenase, Nuo, is a major  
225 contributor to inward electron transfer. Future studies with Nuo deletion strains will enable us to  
226 elucidate the link between respiratory quinones and NADH in our system.

227 In this study, we have successfully driven a heterologous reduction reaction inside living  
228 bacteria using an extracellular electrode as the electron source. Rather than using native  
229 capabilities of acetogenic bacteria, we engineered a metal-reducing organism to reverse the flow  
230 of electrons in its respiratory chain. This represents a proof of concept for an engineered  
231 microbial electrosynthesis pathway, and with further development this platform can be used to  
232 upgrade bioproducts through electrofermentation or to fix CO<sub>2</sub>. Because electrical energy is one  
233 of the inputs to the system, the organic molecules produced also represent storage of electrical  
234 energy. This type of storage strategy will become essential as wind and solar power capacity

235 increase. Wind and solar energy are intermittent sources; therefore, robust energy storage  
236 methods are critical. While significant improvements in engineered microbial electrosynthesis  
237 must still be made, a critical mass of researchers forming around this concept will help propel  
238 *Shewanella* based electrosynthesis toward real world application.

239

## 240 **Methods**

### 241 Bacterial strains, plasmids, and growth conditions

242 Strains and plasmids used in this study are listed in Table 1. *E. coli* strains were grown at 37°C  
243 and *S. oneidensis* strains at 30°C, both with shaking at 250 rpm. Strains were grown in LB  
244 medium (Miller, Accumedia) for assembly and initial verification of strains. Strains bearing  
245 pBBR1-MCS2-derived plasmids were grown with a final concentration of 50 µg/mL kanamycin.  
246 Pre-cultures for bioelectrochemical experiments were grown in M5 minimal medium: 1.29 mM  
247 K<sub>2</sub>HPO<sub>4</sub>, 1.65 mM KH<sub>2</sub>PO<sub>4</sub>, 7.87 mM NaCl, 1.70 mM NH<sub>4</sub>SO<sub>4</sub>, 475 µM MgSO<sub>4</sub> · 7H<sub>2</sub>O, 10 mM  
248 HEPES, 0.01% (w/v) casamino acids, 1X Wolfe's mineral solution (Al was not included), and  
249 1X Wolfe's vitamin solution (riboflavin was not included), pH adjusted to 7.2 with 5 M NaOH.  
250 M5 medium was supplemented with D,L-lactate to a final concentration of 20 mM. M5 medium  
251 with the following modifications was used in the working electrode chamber during  
252 bioelectrochemical experiments: 100 mM HEPES, no carbon source, no casamino acids, 1 µM  
253 riboflavin.

254

### 255 Design and assembly of *Bdh* and *Bdh-PR* plasmids

256 The gene sequence encoding butanediol dehydrogenase in *Enterobacter cloacae* was  
257 downloaded from the NCBI gene database (NCBI Reference NC\_014121.1). The codon usage

258 was optimized for *S. oneidensis* MR-1 using JCAT Codon Adaptation Tool ([www.jcat.de](http://www.jcat.de)). A  
259 FLAG tag (44) was added immediately before the stop codon and the Salis lab RBS calculator  
260 (45) was used to design an optimized RBS for the Bdh-FLAG sequence. Sequences of 20 base  
261 pairs flanking the target SmaI restriction sites in the pBBR1-MCS2 sequence were added as  
262 flanking regions on the codon optimized RBS-Bdh-FLAG sequence for use in assembly. The  
263 entire sequence was submitted to Integrated DNA Technologies for synthesis as a gBlock gene  
264 fragment. The same general procedure was utilized to add the gene coding for proteorhodopsin  
265 to the plasmid containing *bdh*.

266 We isolated pBBR1-MCS2 plasmid DNA from *E. coli* using an E.Z.N.A plasmid DNA  
267 kit (Omega Bio-Tek). Prepared plasmid DNA was linearized using SmaI (New England Biolabs,  
268 Ipswich, MA) digestion for 4 hours at 25°C. The synthesized RBS-Bdh-FLAG insert was  
269 resuspended in water to a final concentration of 10 ng/μL and was assembled with linearized  
270 pBBR1-MCS2 plasmid using NEBuilder High Fidelity DNA assembly kit (New England  
271 Biolabs) using 50 ng of pBBR1-MCS2 and 100 ng of RBS-Bdh-FLAG insert. Assembled  
272 pBBR1-MCS2-Bdh was transformed into *E. coli* Mach1 chemically competent cells (Invitrogen).  
273 pBBR1-MCS2-Bdh-PR was prepared as above except pBBR1MCS2-Bdh was digested using  
274 NdeI and SpeI (New England Biolabs, Ipswich, MA) for 3 hours at 37°C prior to assembly with  
275 the synthesized PR gene. Transformants were initially screened via PCR using M13 forward and  
276 reverse primers and then sequenced (Sanger sequencing, RTSF Genomics Core, Michigan State  
277 University) to verify proper assembly and transformation. Verified Bdh and Bdh-PR plasmids  
278 were transformed into chemically competent *E. coli* WM3064 for use in conjugation with *S.*  
279 *oneidensis*. Conjugation was performed using a standard protocol for *S. oneidensis* MR-1 (46).

280

281 *Verifying expression by Western blot*

282 Expression of Bdh and PR were verified via Western blot through use of FLAG tags added  
283 during gene synthesis. Cells were cultured in 5 mL of LB for 16 hours before 200  $\mu$ L was  
284 centrifuged for 2 minutes at 10,000 rpm. Supernatant was removed, and cells were resuspended  
285 in 200  $\mu$ L of a mixture of 1 mL Laemmli buffer, 20  $\mu$ L of concentrated bromophenol blue (JT  
286 Baker, D29303) in 5X Laemmli buffer, and 10  $\mu$ L of 1 M DTT. Cells were vortexed to mix and  
287 incubated at 95°C for 10 minutes. A mini-PROTEAN tetra cell electrophoresis chamber (Biorad,  
288 1658005EDU) was loaded with 1X TGS buffer. Samples were vortexed a 5  $\mu$ L was loaded onto  
289 a mini-protean TGX stain free gel (Biorad, 4568095) alongside 5  $\mu$ L of Precision Plus ladder  
290 (Biorad, 1610376).

291 Samples were run at 100 V for 1.5 hours until dye front moved off the gel. The gel  
292 cassette was broken, and gel removed to 1X Transfer buffer (Biorad, 10026938). Proteins were  
293 then transferred to a nitrocellulose membrane (Biorad, 1704270) using a Biorad Turbo transfer  
294 system (Biorad, 1704150). The membrane was rinsed with 30 mL TBST buffer, this buffer was  
295 discarded, and the membrane was blocked using 50 mL of 3% BSA TBST buffer for 1 hour on  
296 an orbital shaker. Blocking solution was discarded and replaced with 30 mL of 3% BSA TBST  
297 buffer then 7.8  $\mu$ L of 3.85 mg/mL anti-FLAG antibody (Sigma-Aldrich, F3165) was added. The  
298 membrane was then incubated for 16 hours at 4°C, on an orbital shaker.

299 The membrane was then rinsed for 5 minutes with TBST buffer three times. After rinsing  
300 30 mL of 3% BSA TBST buffer with 0.0625  $\mu$ L of anti-mouse antibody (Sigma-Aldrich, A9044)  
301 was added. The membrane was incubated for 1 hour at RT. Buffer was discarded and the  
302 membrane rinsed with TBST buffer for 5 minutes, three times. ECL Clarity chemiluminescence  
303 solution (Biorad, 1705061) was prepared by mixing 10 mL of peroxide solution with 10 mL of

304 enhancer solution, then adding the entire volume to the membrane. The membrane was incubated  
305 for 5 minutes, the ECL solution was discarded and the membrane was imaged using a Kodak  
306 4000R image station and Caresteam Molecular Imaging software.

307

### 308 Bioelectrochemical system construction and operation

309 Bioelectrochemical measurements were performed in custom two-chambered bioreactors  
310 separated by a cation exchange membrane (Membranes International, CMI-7000S) cut in a 4.5  
311 cm circle, to completely cover the 15 mm opening connecting working and counter chambers.  
312 Working electrodes were prepared from carbon felt (Alfa Aesar, 43200RF) cut into 50x25 mm  
313 rectangles and adhered to a titanium wire using carbon adhesive (Sigma-Aldrich, 09929-30G)  
314 and allowed to dry for 16 hours. Reference electrodes were prepared by oxidizing silver wires  
315 electrochemically in a dilute KCl solution and fixing them in saturated KCl-agar in a custom-  
316 made glass housing. The housing maintained ionic connection between the reference electrode  
317 and working chamber via a magnesia frit (Sigma-Aldrich, 31408-1EA). Counter electrodes were  
318 graphite rods 1/8" in diameter (Electron Microscopy Science, 07200) suspended in the counter  
319 chamber filled with PBS. Working chambers were filled with 140 mL of M5 medium (100 mM  
320 HEPES, no Casamino acids) prior to autoclaving. After autoclaving, 1.7 mL 100X vitamin stock,  
321 1.7 mL Wolfe's minerals (no Al), 0.17 mL 50 mg/mL kanamycin, and 0.85 mL 0.2 mM  
322 riboflavin were added to working chamber.

323 Reactors were connected to a potentiostat (VMP, BioLogic USA) and the working  
324 electrode poised at +0.4 V<sub>SHE</sub>. Current was measured every 1 second for the duration of the  
325 experiment. Current measurements were collected for at least 16 hours prior to inoculation.

326 Reactors were inoculated with cultures grown in 50 mL M5 medium supplemented with 20 mM

327 D,L-lactate. Cultures were grown in 250-mL flasks at 30°C for 17 hours shaking at 275 rpm.  
328 After 17 hours, 25  $\mu$ L 20 mM all-*trans*-retinal (vitamin A aldehyde, Sigma-Aldrich, R2500), the  
329 essential proteorhodopsin cofactor (47), was added to designated flasks for functional PR testing  
330 to a final concentration of 10  $\mu$ M and all flasks were returned to incubator, shaking, for 1 hour.

331 To achieve higher inoculum density without adjusting growth time and phase, two 50 mL  
332 culture volumes were prepared for each reactor. Absorbance at 600 nm was determined for each  
333 culture using a biophotometer (Eppendorf, D30) before the volume was transferred to a 50 mL  
334 conical tube (VWR, 89039-664) and centrifuged for 5 minutes at 10,000 rpm (Thermo Scientific  
335 ST8R; Rotor: 75005709). Supernatant was removed, and a second volume of cells was added to  
336 the conical tube containing the cell pellet before a second centrifugation step. Supernatant was  
337 removed, and the combined pellets were resuspended in 10 mL of M5 (100 mM HEPES).

338 Absorbance at 600 nm was determined for each prepared volume of cells before being  
339 standardized to  $OD_{600}=3.6$ . The working chamber of each bioelectrochemical system was then  
340 inoculated with 9 mL of standardized cell suspension using an 18g needle (Beckton Dickson,  
341 305196) and 10-mL syringe (Beckton Dickson, 302995). The working electrode was poised at  
342 +0.4  $V_{SHE}$  for 6 hours, in the presence of ambient oxygen before the potential was changed to  
343 -0.3  $V_{SHE}$ , and  $N_2$  gas, 99.9% (Airgas) was bubbled into the reactors through a 0.2  $\mu$ m filter. The  
344 rate of flow of nitrogen gas was observed using a bubbler attached to the gas outlet line from the  
345 reactors. The rate of gas flow was maintained so there was positive pressure against the water in  
346 the bubbler and bubble rate was kept constant between reactors. After 16 hours, sterile, anoxic  
347 acetoin solution was added to a final concentration of 10 mM.

348 Prior to inoculation, 0.93 m of green LED light strips (FAVOLCANO, 600 LEDs/5 m, 24  
349 W/5 m,  $\leq 6A$  /5 m) were attached to the exterior of the working chamber and switched on. Light

350 cycling was performed at 24 hours post acetoin injection, lights were turned off for 1 hour  
351 followed by 1 hour on. Light cycles at 24 hours were repeated three times, after which lights  
352 were left on.

353 Samples were regularly removed from the bioreactors for determination of OD<sub>600</sub> and  
354 HPLC analysis. A 2-mL sample was taken approximately every 24 hours using a 21g needle  
355 (Beckton Dickson, 305167) and 3-mL syringe (Beckton Dickson, 309657). One mL was used for  
356 determination of OD<sub>600</sub>. One mL was transferred to a micro-centrifuge tube (VWR, 20170-038)  
357 and frozen at -20°C until preparation for HPLC analysis. Experiments without a set potential on  
358 the working electrode were set up as above except, immediately after acetoin injection the  
359 potentiostat was disconnected from the working electrodes.

360 Experiments testing for the effect of hydrogenase activity (**Figure 6**) were performed as  
361 above expect as follows. Potential was set to -0.3 V<sub>SHE</sub> during background data collection and no  
362 anodic potential was used. Oxygen removal using N<sub>2</sub> gas was also started during background  
363 data collection and continued for the entire experiment. Cultures grown for reactor inoculation  
364 were standardized to the lowest observed OD<sub>600</sub> after 18 hours of growth, instead of a target OD  
365 of 3.6. Finally, acetoin was injected two hours after inoculation once a stable base line current  
366 was achieved.

367

### 368 HPLC Analysis

369 HPLC analysis was performed on a Shimadzu 20A HPLC, using an Aminex HPX-87H (BioRad,  
370 Hercules, CA) column with a Micro-guard Cation H<sup>+</sup> guard column (BioRad, Hercules, CA) at  
371 65°C. Compounds of interest were separated using a 0.6 mL/min flow rate, in 5 mM sulfuric acid  
372 with a 30-minute run time. Eluent was prepared by diluting a 50% HPLC-grade sulfuric acid



373 solution (Fluka) in Milli-Q water and degassing the solution at 37°C for 3-5 days before use.  
374 Compounds of interest were detected by a refractive index detector (Shimadzu, RID-20A)  
375 maintained at 60°C. Samples were prepared by centrifuging 1-mL samples taken from the  
376 working electrode chambers for 10 minutes at 13,000 rpm in a microcentrifuge (Minispin Plus,  
377 Eppendorf) to remove cells. The supernatant was removed and transferred to a 2.0-mL glass  
378 HPLC vial (Vial: Restek, 21140; Cap: JG Finneran, 5395F09). Mixed standards of 2,3-  
379 butanediol and acetoin were prepared at concentrations of 1, 2, 5, 10, and 15 mM. Samples were  
380 maintained at 10°C by an auto-sampler (Shimadzu, SIL-20AHT) throughout analysis. Acetoin  
381 and 2,3-butanediol concentrations in the samples were determined using linear calibration curves  
382 based on the external standards.

383

#### 384 Data analysis

385 Analysis of HPLC and current data was performed using Rstudio using the following packages:  
386 ggplot2 (48), reshape2 (49), dplyr (50), and TTR (51).

387

#### 388 **Acknowledgements**

389 The authors thank Dr. Jeffrey Gralnick (University of Minnesota) for providing a plasmid  
390 containing the PR gene and Dr. N. Cecilia Martinez Gomez for helpful comments on the  
391 manuscript. This work was partially funded by NSF CAREER award 1750785. This work was  
392 also supported by the USDA National Institute of Food and Agriculture, Hatch project 1009805.

393

394 **Tables and Figures**

395 **Table 1.** Strains and plasmids used in this study

396

| <b>Strain or plasmid</b>                 | <b>Description</b>                                                                                                                                                                                           | <b>Source</b> |
|------------------------------------------|--------------------------------------------------------------------------------------------------------------------------------------------------------------------------------------------------------------|---------------|
| <i>E. coli</i>                           |                                                                                                                                                                                                              |               |
| <b>Mach1</b>                             | Host strain for plasmids                                                                                                                                                                                     |               |
| <b>WM3064</b>                            | Conjugation strain for <i>S. oneidensis</i>                                                                                                                                                                  | (52)          |
| <i>S. oneidensis</i>                     |                                                                                                                                                                                                              |               |
| <b>MR-1</b>                              | Wild Type                                                                                                                                                                                                    | (53)          |
| <b><math>\DeltahyaB\DeltahydA</math></b> | Hydrogenase double knockout mutant                                                                                                                                                                           | (54)(55)      |
| <b>Plasmids</b>                          |                                                                                                                                                                                                              |               |
| <b>pBBR1-MCS2</b>                        | Kan resistance, broad host vector                                                                                                                                                                            | (56)          |
| <b>pBBR1-PR</b>                          | pBBR1MCS2 bearing proteorhodopsin from uncultured marine gamma proteobacterium <i>Prochlorococcus marinus</i> GenBank accession #: AF279106_37                                                               | (57)(33)      |
| <b>pBdh</b>                              | pBBR1MCS2 bearing butanediol dehydrogenase gene from <i>Enterobacter cloacae</i>                                                                                                                             | This study    |
| <b>pBdh-PR</b>                           | pBBR1MCS2 bearing butanediol dehydrogenase from <i>Enterobacter cloacae</i> and proteorhodopsin from uncultured marine gamma proteobacterium <i>Prochlorococcus marinus</i> GenBank accession #: AF279106_37 | This study    |

397

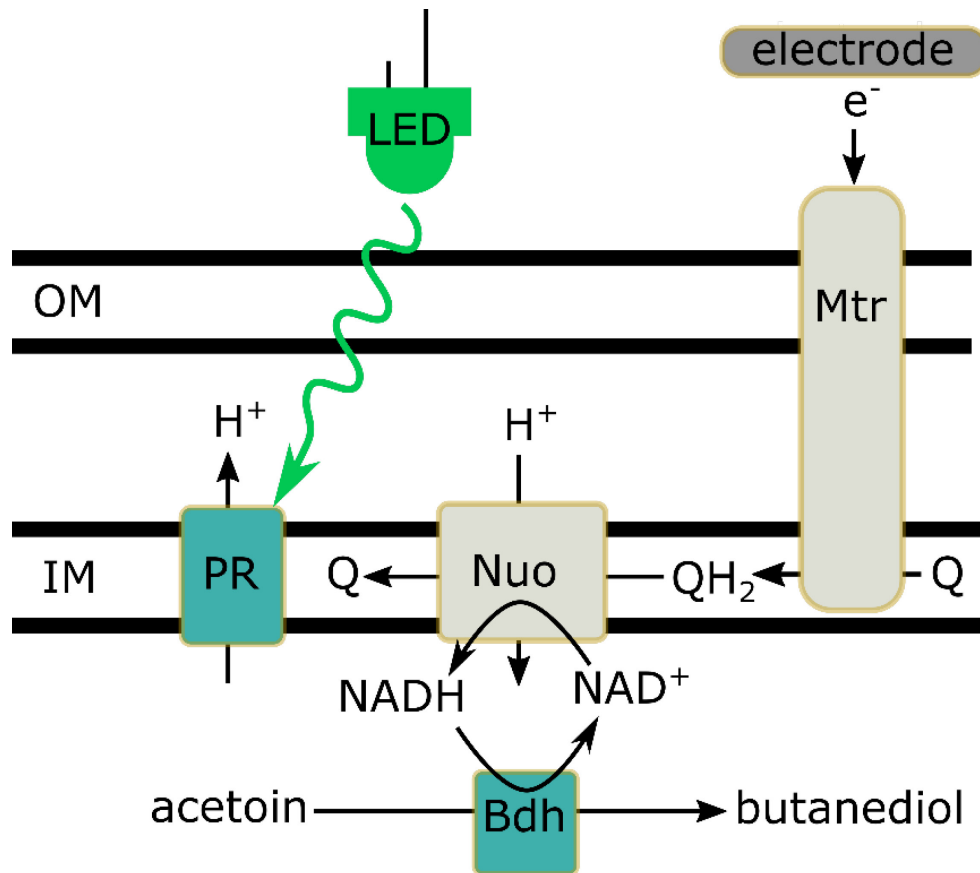

398  
399  
400

401 **Figure 1. Engineered inward electron transfer pathway.** *Shewanella oneidensis* MR-1  
402 pathway designed to transfer electrons from the electrode to  $\text{NAD}^+$  to generate intracellular  
403 reducing equivalents. Native proteins are shown in grey, heterologous proteins are shown in  
404 green. OM: outer membrane; IM: inner membrane; LED: green light source. Nuo is one of four  
405 NADH dehydrogenases encoded in the *S. oneidensis* MR-1 genome.

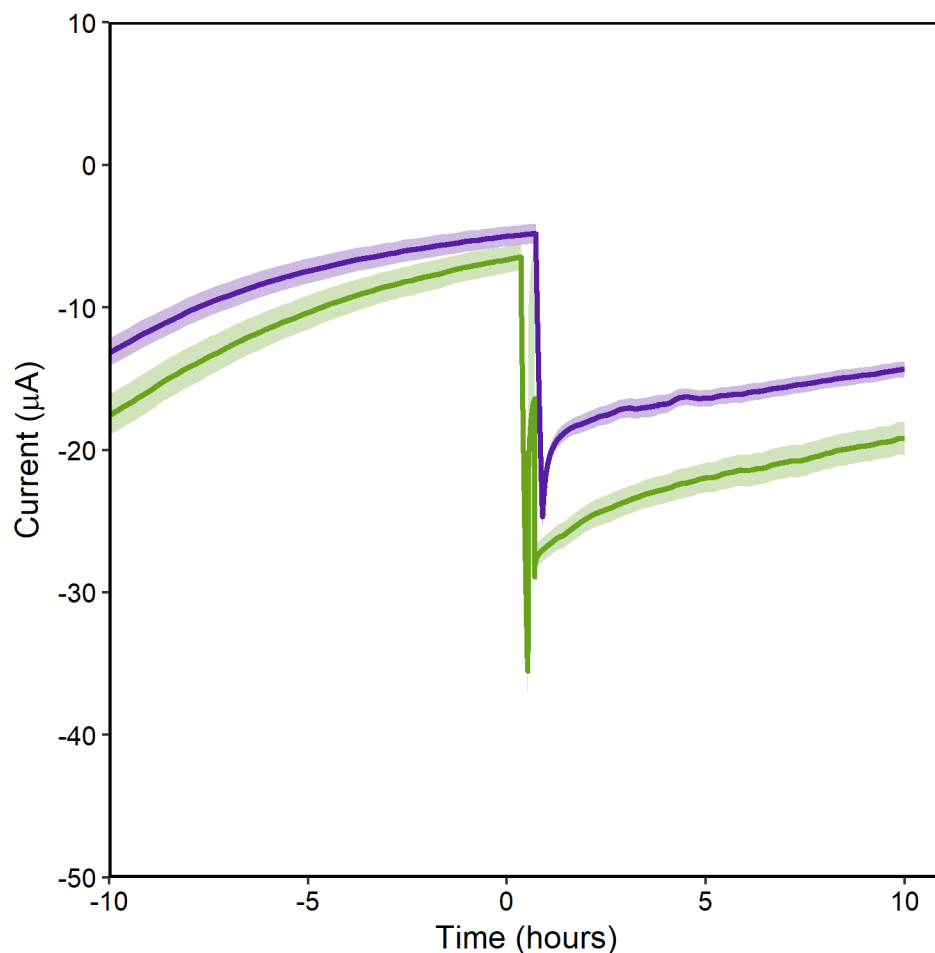

406  
407 **Figure 2. Cathodic current measurement during electron acceptor injection.** Cathodic  
408 current increases significantly after the electron acceptor, acetoin, is added to the  
409 bioelectrochemical system. Time 0 represents acetoin injection. Current measured in  
410 bioelectrochemical systems containing cells grown with holo-PR are shown in green and those  
411 containing apo-PR are shown in purple. Each line represents the average of three replicates with  
412 standard error shown in transparent ribbons.  
413

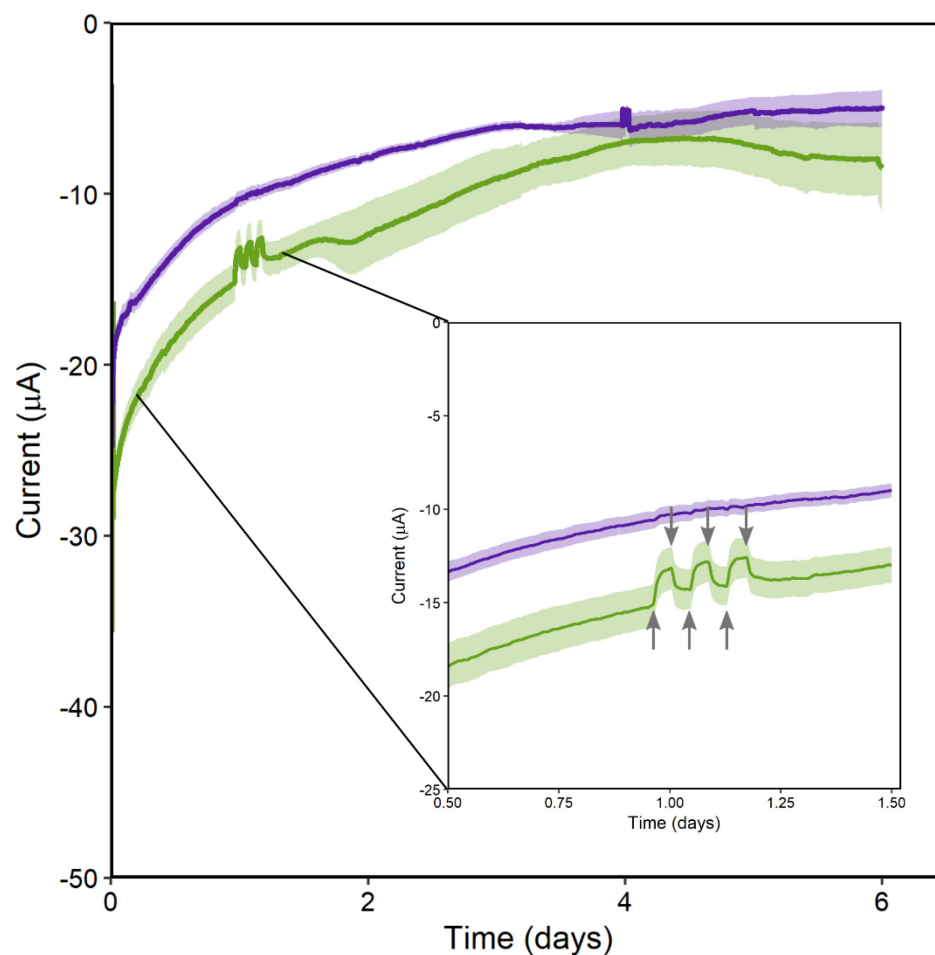

414  
415 **Figure 3. Response of cathodic current to green light.** Current was measured in  
416 bioelectrochemical systems with electrodes poised at  $-0.3 V_{SHE}$ . Current shown was measured  
417 beginning at injection of acetoin (time 0). Current measured in reactors containing cells with  
418 holo-PR are shown in green and those containing apo-PR are shown in purple. Inset graph shows  
419 current change due to removal or addition of green light. Lights were turned off for 3 one hour  
420 intervals beginning just before time = 1 day. Each line represents the average of three replicates  
421 with standard error shown in transparent ribbons.

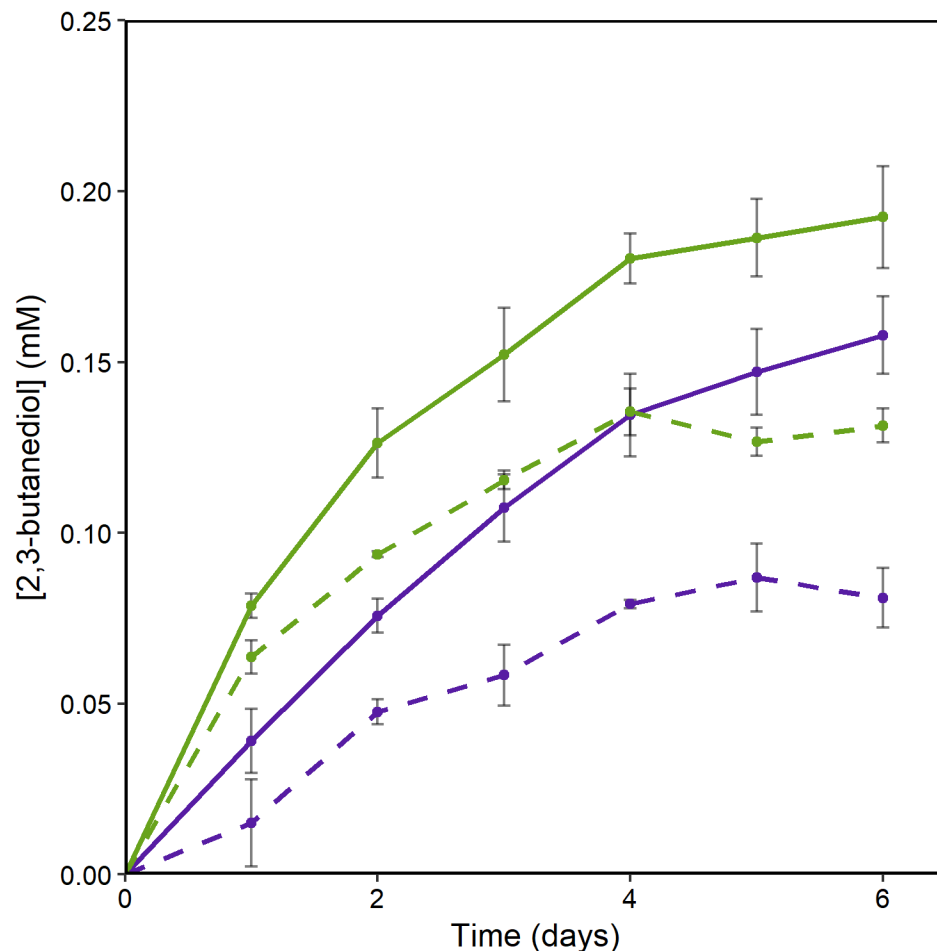

422  
423 **Figure 4. 2,3-butanediol accumulation increases when potential is applied to the working**  
424 **electrode.** HPLC measurement of 2,3 butanediol concentration in bioelectrochemical systems  
425 over time. Samples taken from working electrode chambers with electrodes poised at  $-0.3 V_{SHE}$   
426 are shown in solid green and purple lines. Samples taken from bioelectrochemical systems  
427 disconnected from the potentiostat are shown in dashed green and purple lines. Samples from  
428 reactors containing cells with holo-PR are shown in green and those containing apo-PR are  
429 shown in purple. Each point represents the average of three replicates with standard error shown  
430 in error bars.

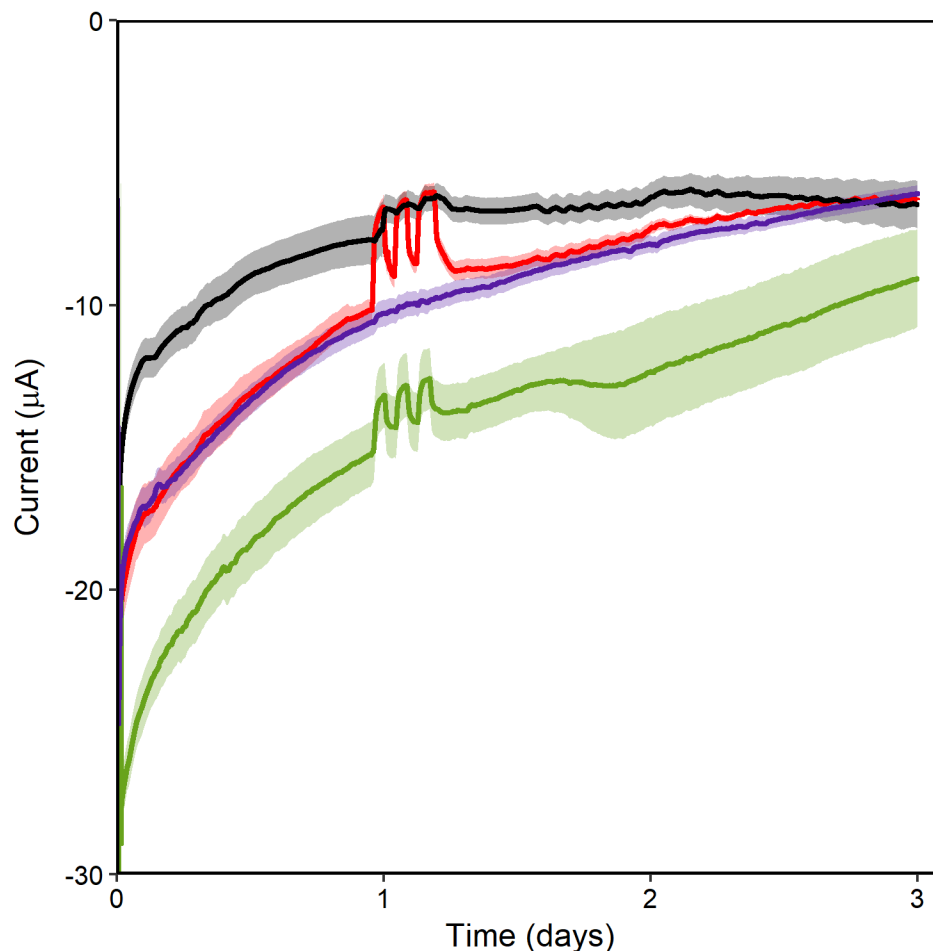

431  
432  
433  
434  
435  
436  
437  
438  
439

**Figure 5. Both proteorhodopsin and butanediol dehydrogenase increase current.** Current measured in bioelectrochemical systems containing cells expressing Bdh-PR with holo-PR are shown in green and those containing apo-PR are shown in purple. Current measured in reactors containing cells expressing only holo-PR are shown in red and those containing only apo-PR are shown in black. Current was measured in bioreactors with electrodes poised at  $-0.3 V_{SHE}$ . Current shown begins at injection of acetoin (time 0). Each line represents the average of three replicates with standard error shown in transparent ribbons.

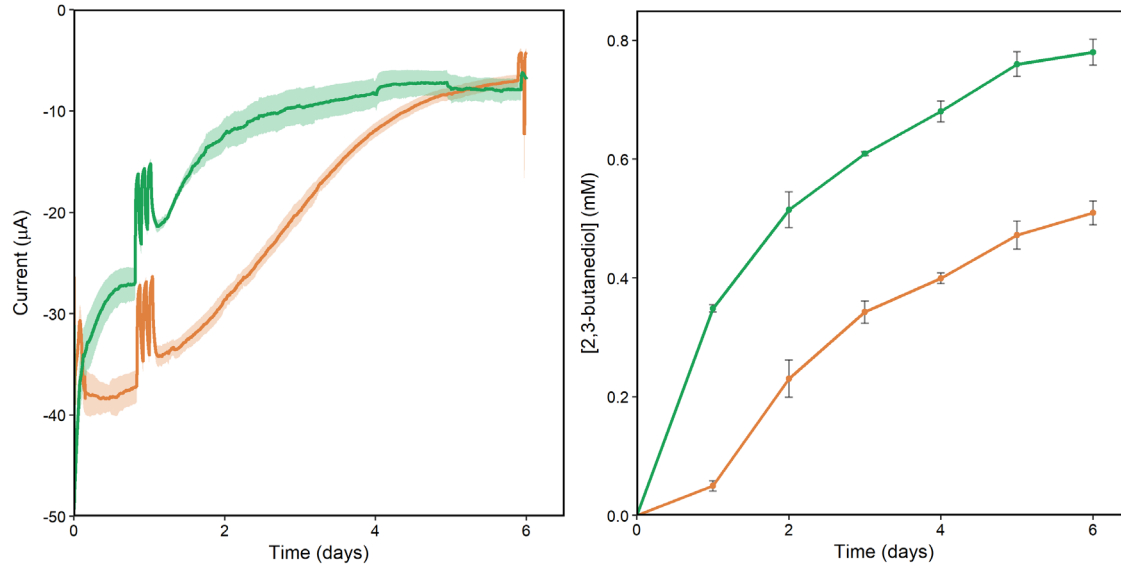

440  
441  
442  
443  
444  
445  
446  
447  
448  
449  
450  
451  
452  
453  
454  
455  
456  
457  
458  
459  
460  
461  
462  
463  
464  
465  
466  
467  
468  
469  
470  
471

**Figure 6. Removal of native hydrogenases decreases current and increases 2,3-butanediol production.** (A) Current and (B) 2,3-butanediol accumulation observed in bioreactors containing cells expressing Bdh and holo-PR. The strain without hydrogenases is shown in dark green and the wild-type background is shown in orange. Data shown was measured beginning at injection of acetoin (time 0). Each point represents the average of three replicates with standard error shown in transparent ribbons or error bars.



## 472 References

- 473 1. **Rabaey K, Rozendal RA.** 2010. Microbial electrosynthesis — revisiting the electrical  
474 route for microbial production. *Nat Rev Microbiol* **8**:706–716.
- 475 2. **Rosenbaum MA, Henrich AW.** 2014. Engineering microbial electrocatalysis for  
476 chemical and fuel production. *Curr Opin Biotechnol* **29**:93–98.
- 477 3. **Nevin KP, Woodard TL, Franks AE, Summers ZM, Lovley DR.** 2010. Microbial  
478 electrosynthesis: Feeding microbes electricity to convert carbon dioxide and water to  
479 multicarbon extracellular organic compounds. *MBio* **1**:e00103-10.
- 480 4. **Nevin KP, Hensley SA, Franks AE, Summers ZM, Ou J, Woodard TL, Snoeyenbos-  
481 West OL, Lovley DR.** 2011. Electrosynthesis of organic compounds from carbon dioxide  
482 is catalyzed by a diversity of acetogenic microorganisms. *Appl Environ Microbiol*  
483 **77**:2882–2886.
- 484 5. **Ganigué R, Puig S, Batlle-Vilanova P, Balaguer MD, Colprim J, Mikkelsen M,  
485 Jørgensen M, Krebs FC, Haszeldine RS, Rabaey K, Rozendal RA, Nevin KP,  
486 Woodard TL, Franks AE, Summers ZM, Lovley DR, Marshall CW, Ross DE, Fichot  
487 EB, Norman RS, May HD, Marshall CW, Ross DE, Fichot EB, Norman RS, May  
488 HD, Sharma M, Aryal N, Sarma PM, Vanbroekhoven K, Lal B, Benetton XD, Pant  
489 D, Steinbusch KJJ, Hamelers HVM, Schaap JD, Kampman C, Buisman CJN,  
490 Eerten-Jansen MCAA Van, Heijne A Ter, Grootscholten TIM, Steinbusch KJJ,  
491 Sleutels THJA, Hamelers HVM, Buisman CJN, Dwidar M, Park J-Y, Mitchell RJ,  
492 Sang B-I, Sánchez P, Ganigue R, Bañeras L, Colprim J, Daniell J, Köpke M,  
493 Simpson SD, Gössner AS, Picardal F, Tanner RS, Drake HL, Thauer RK,  
494 Jungermann K, Decker K, Pi PPH, Agler MT, Wrenn BA, Zinder SH, Angenent LT,  
495 Batlle-Vilanova P, Puig S, Gonzalez-Olmos R, Vilajeliu-Pons A, Bañeras L, Balaguer  
496 MD, Colprim J, Jeremiasso AW, Hamelers HVM, Buisman CJN, Eerten-jansen  
497 MCAA Van, Heijne A Ter, Buisman CJN, Hamelers HVM, Bechthold I, Bretz K,  
498 Kabasci S, Kopitzky R, Springer A, Andersen SJ, Hennebel T, Gildemyn S, Coma  
499 M, Desloover J, Berton J, Tsukamoto J, Stevens C V., Rabaey K, Tanner RS, Miller  
500 LM, Yang D.** 2015. Microbial electrosynthesis of butyrate from carbon dioxide. *Chem  
501 Commun* **51**:3235–3238.
- 502 6. **Patil SA, Arends JBA, Vanwonterghem I, van Meerbergen J, Guo K, Tyson GW,  
503 Rabaey K.** 2015. Selective enrichment establishes a stable performing community for  
504 microbial electrosynthesis of acetate from CO<sub>2</sub>. *Environ Sci Technol* **49**:8833–8843.
- 505 7. **Park DH, Zeikus JG.** 1999. Utilization of electrically reduced neutral red by  
506 *Actinobacillus succinogenes*: Physiological function of neutral red in membrane-driven  
507 fumarate reduction and energy conservation. *J Bacteriol* **181**:2403–2410.
- 508 8. **Park DH, Laivenieks M, Guettler M V, Jain MK, Zeikus JG.** 1999. Microbial  
509 utilization of electrically reduced neutral red as the sole electron donor for growth and  
510 metabolite production. *Appl Environ Microbiol* **65**:2912–7.
- 511 9. **Drake HL, Gößner AS, Daniel SL.** 2008. Old acetogens, new light, p. 100–128. *In*  
512 *Annals of the New York Academy of Sciences*.
- 513 10. **Müller V.** 2003. Energy Conservation in Acetogenic Bacteria. *Appl Environ Microbiol*.
- 514 11. **Ueki T, Nevin KP, Woodard TL, Lovley DR.** 2014. Converting carbon dioxide to  
515 butyrate with an engineered strain of *Clostridium ljungdahlii*. *MBio* **5**.
- 516 12. **Schiel-Bengelsdorf B, Dürre P.** 2012. Pathway engineering and synthetic biology using  
517 acetogens. *FEBS Lett* **586**:2191–2198.

- 518 13. **Harrington TD, Tran VN, Mohamed A, Renslow R, Biria S, Orfe L, Call DR,**  
519 **Beyenal H.** 2015. The mechanism of neutral red-mediated microbial electrosynthesis in  
520 *Escherichia coli*: menaquinone reduction. *Bioresour Technol* **192**:689–95.
- 521 14. **Harrington TD, Mohamed A, Tran VN, Biria S, Gargouri M, Park J-J, Gang DR,**  
522 **Beyenal H.** 2015. Neutral red-mediated microbial electrosynthesis by *Escherichia coli*,  
523 *Klebsiella pneumoniae*, and *Zymomonas mobilis*. *Bioresour Technol* **195**:57–65.
- 524 15. **Le QAT, Kim HG, Kim YH.** 2018. Electrochemical synthesis of formic acid from CO<sub>2</sub>  
525 catalyzed by *Shewanella oneidensis* MR-1 whole-cell biocatalyst. *Enzyme Microb*  
526 *Technol* **116**:1–5.
- 527 16. **Battle-Vilanova P, Puig S, Gonzalez-Olmos R, Balaguer MD, Colprim J.** 2016.  
528 Continuous acetate production through microbial electrosynthesis from CO<sub>2</sub> with  
529 microbial mixed culture. *J Chem Technol Biotechnol* **91**:921–927.
- 530 17. **Jourdin L, Grieger T, Monetti J, Flexer V, Freguia S, Lu Y, Chen J, Romano M,**  
531 **Wallace GG, Keller J.** 2015. High acetic acid production rate obtained by microbial  
532 electrosynthesis from carbon dioxide. *Environ Sci Technol* **49**:13566–13574.
- 533 18. **Jourdin L, Freguia S, Flexer V, Keller J.** 2016. Bringing high-rate, CO<sub>2</sub>-based  
534 microbial electrosynthesis closer to practical implementation through improved electrode  
535 design and operating conditions. *Environ Sci Technol* **50**:1982–1989.
- 536 19. **Battle-Vilanova P, Ganigué R, Ramió-Pujol S, Bañeras L, Jiménez G, Hidalgo M,**  
537 **Balaguer MD, Colprim J, Puig S.** 2017. Microbial electrosynthesis of butyrate from  
538 carbon dioxide: Production and extraction. *Bioelectrochemistry* **117**:57–64.
- 539 20. **Bajracharya S, ter Heijne A, Dominguez Benetton X, Vanbroekhoven K, Buisman**  
540 **CJN, Strik DPBTB, Pant D.** 2015. Carbon dioxide reduction by mixed and pure cultures  
541 in microbial electrosynthesis using an assembly of graphite felt and stainless steel as a  
542 cathode. *Bioresour Technol* **195**:14–24.
- 543 21. **Coursolle D, Gralnick JA.** 2012. Reconstruction of extracellular respiratory pathways for  
544 iron(III) reduction in *Shewanella oneidensis* strain MR-1. *Front Microbiol* **3**:56.
- 545 22. **Coursolle D, Baron DB, Bond DR, Gralnick JA.** 2010. The Mtr respiratory pathway is  
546 essential for reducing flavins and electrodes in *Shewanella oneidensis*. *J Bacteriol*  
547 **192**:467–474.
- 548 23. **Clarke TA, Edwards MJ, Gates AJ, Hall A, White GF, Bradley J, Reardon CL, Shi**  
549 **L, Beliaev AS, Marshall MJ, Wang Z, Watmough NJ, Fredrickson JK, Zachara JM,**  
550 **Butt JN, Richardson DJ.** 2011. Structure of a bacterial cell surface decaheme electron  
551 conduit. *Proc Natl Acad Sci* **108**:9384–9389.
- 552 24. **Myers CR, Myers JM.** 2002. MtrB Is required for proper incorporation of the  
553 cytochromes OmcA and OmcB into the outer membrane of *Shewanella putrefaciens* MR-  
554 1. *Appl Environ Microbiol* **68**:5585–5594.
- 555 25. **Liu Y, Wang Z, Liu J, Levar C, Edwards MJ, Babauta JT, Kennedy DW, Shi Z,**  
556 **Beyenal H, Bond DR, Clarke TA, Butt JN, Richardson DJ, Rosso KM, Zachara JM,**  
557 **Fredrickson JK, Shi L.** 2014. A trans-outer membrane porin-cytochrome protein  
558 complex for extracellular electron transfer by *Geobacter sulfurreducens* PCA. *Environ*  
559 *Microbiol Rep* **6**:776–785.
- 560 26. **Marritt SJ, Lowe TG, Bye J, McMillan DGG, Shi L, Fredrickson J, Zachara J,**  
561 **Richardson DJ, Cheesman MR, Jeuken LJC, Butt JN.** 2012. A functional description  
562 of CymA, an electron-transfer hub supporting anaerobic respiratory flexibility in  
563 *Shewanella*. *Biochem J* **444**:465–474.

- 564 27. **Fredrickson JK, Romine MF, Beliaev AS, Auchtung JM, Driscoll ME, Gardner TS,**  
565 **Nealson KH, Osterman AL, Pinchuk G, Reed JL, Rodionov DA, Rodrigues JLM,**  
566 **Saffarini DA, Serres MH, Spormann AM, Zhulin IB, Tiedje JM.** 2008. Towards  
567 environmental systems biology of *Shewanella*. *Nat Rev Microbiol* **6**:592–603.
- 568 28. **TerAvest MA, Ajo-Franklin CM.** 2015. Transforming exoelectrogens for biotechnology  
569 using synthetic biology. *Biotechnol Bioeng* **113**:687–697.
- 570 29. **Ross DE, Flynn JM, Baron DB, Gralnick JA, Bond DR.** 2011. Towards  
571 electrosynthesis in *Shewanella*: Energetics of reversing the Mtr pathway for reductive  
572 metabolism. *PLoS One* **6**:e16649.
- 573 30. **Rowe AR, Rajeev P, Jain A, Pirbadian S, Okamoto A, Gralnick JA, El-Naggar MY,**  
574 **Nealson KH.** 2018. Tracking electron uptake from a cathode into *Shewanella* cells:  
575 implications for energy acquisition from solid-substrate electron donors. *MBio* **9**.
- 576 31. **Pinchuk GE, Hill EA, Geydebekht O V, De Ingeniis J, Zhang X, Osterman A, Scott**  
577 **JH, Reed SB, Romine MF, Konopka AE, Beliaev AS, Fredrickson JK, Reed JL.**  
578 2010. Constraint-based model of *Shewanella oneidensis* MR-1 metabolism: a tool for data  
579 analysis and hypothesis generation. *PLoS Comput Biol* **6**:e1000822.
- 580 32. **Spero MA, Aylward FO, Currie CR, Donohue TJ.** 2015. Phylogenomic analysis and  
581 predicted physiological role of the proton-translocating NADH:quinone oxidoreductase  
582 (complex I) across bacteria. *MBio* **6**:e00389-15-.
- 583 33. **Johnson ET, Baron DB, Naranjo B, Bond DR, Schmidt-Dannert C, Gralnick JA.**  
584 2010. Enhancement of survival and electricity production in an engineered bacterium by  
585 light-driven proton pumping. *Appl Environ Microbiol* **76**:4123–4129.
- 586 34. **Hunt KA, Flynn JM, Naranjo B, Shikhare ID, Gralnick JA.** 2010. Substrate-level  
587 phosphorylation is the primary source of energy conservation during anaerobic respiration  
588 of *Shewanella oneidensis* strain MR-1. *J Bacteriol* **192**:3345–3351.
- 589 35. **Kreuzer HW, Hill EA, Moran JJ, Bartholomew RA, Yang H, Hegg EL.** 2014.  
590 Contributions of the [NiFe]- and [FeFe]-hydrogenase to H<sub>2</sub> production in *Shewanella*  
591 *oneidensis* MR-1 as revealed by isotope ratio analysis of evolved H<sub>2</sub>. *FEMS Microbiol*  
592 *Lett* **352**:18–24.
- 593 36. **Pinchuk GE, Geydebekht O V., Hill EA, Reed JL, Konopka AE, Beliaev AS,**  
594 **Fredrickson JK.** 2011. Pyruvate and lactate metabolism by *Shewanella oneidensis* MR-1  
595 under fermentation, oxygen limitation, and fumarate respiration conditions. *Appl Environ*  
596 *Microbiol* **77**:8234–8240.
- 597 37. **Blanchet E, Duquenne F, Rafrafi Y, Etcheverry L, Erable B, Bergel A.** 2015.  
598 Importance of the hydrogen route in up-scaling electrosynthesis for microbial CO<sub>2</sub>  
599 reduction. *Energy Environ Sci* **8**:3731–3744.
- 600 38. **Deutzmann JS, Sahin M, Spormann AM.** 2015. Extracellular enzymes facilitate  
601 electron uptake in biocorrosion and bioelectrosynthesis. *MBio* **6**.
- 602 39. **Meshulam-Simon G, Behrens S, Choo AD, Spormann AM.** 2007. Hydrogen  
603 metabolism in *Shewanella oneidensis* MR-1. *Appl Environ Microbiol* **73**:1153–1165.
- 604 40. **Jensen HM, Albers AE, Malley KR, Londer YY, Cohen BE, Helms BA, Weigele P,**  
605 **Groves JT, Ajo-Franklin CM.** 2010. Engineering of a synthetic electron conduit in  
606 living cells. *Proc Natl Acad Sci* **107**:19213–19218.
- 607 41. **Rowe AR, Rajeev P, Jain A, Pirbadian S, Okamoto A, Gralnick JA, El-Naggar MY,**  
608 **Nealson K.** 2017. Tracking electron uptake from a cathode into *Shewanella* cells:  
609 implications for generating maintenance energy from solid substrates. *bioRxiv*.

- 610 42. **Pinchuk GE, Hill EA, Geydebrekht O V., de Ingeniis J, Zhang X, Osterman A, Scott**  
611 **JH, Reed SB, Romine MF, Konopka AE, Beliaev AS, Fredrickson JK, Reed JL.**  
612 2010. Constraint-based model of *Shewanella oneidensis* MR-1 metabolism: A tool for  
613 data analysis and hypothesis generation. *PLoS Comput Biol* **6**:1–8.
- 614 43. **Duhl, K. L., Tefft, N. M., & TerAvest MA.** 2018. *Shewanella oneidensis* MR-1 utilizes  
615 both sodium- and proton-pumping NADH dehydrogenases during aerobic growth. *Appl*  
616 *Environ Microbiol.*
- 617 44. **Einhauser A, Jungbauer A.** 2001. The FLAG<sup>TM</sup> peptide, a versatile fusion tag for the  
618 purification of recombinant proteins. *J Biochem Biophys Methods* **49**:455–465.
- 619 45. **Salis HM.** 2011. The ribosome binding site calculator. *Methods Enzymol* **498**:19–42.
- 620 46. **De Lorenzo V, Herrero M, Jakubzik U, Timmis KN.** 1990. Mini-Tn5 transposon  
621 derivatives for insertion mutagenesis, promoter probing, and chromosomal insertion of  
622 cloned DNA in gram-negative eubacteria. *J Bacteriol* **172**:6568–6572.
- 623 47. **Fuhrman JA, Schwalbach MS, Stingl U.** 2008. Proteorhodopsins: An array of  
624 physiological roles? *Nat Rev Microbiol* **6**:488–494.
- 625 48. **Wickham H.** 2009. ggplot2 Elegant Graphics for Data AnalysisMedia.
- 626 49. **Wickham H.** 2007. Reshaping data with the reshape package. *J Stat Softw* **21**:1–20.
- 627 50. **Wickham H, Francois R.** 2015. dplyr: A Grammar of Data Manipulation. R Packag  
628 version 042 3.
- 629 51. **Ulrich J.** 2017. TTR: Technical Trading Rules. R Packag version 023-2.
- 630 52. **Saltikov CW, Newman DK.** 2003. Genetic identification of a respiratory arsenate  
631 reductase. *Proc Natl Acad Sci U S A* **100**:10983–10988.
- 632 53. **Myers CR, Nealson KH.** 1988. Bacterial manganese reduction and growth with  
633 manganese oxide as the sole electron acceptor. *Science* **240**:1319–1321.
- 634 54. **Meshulam-Simon G, Behrens S, Choo AD, Spormann AM.** 2007. Hydrogen  
635 metabolism in *Shewanella oneidensis* MR-1. *Appl Environ Microbiol* **73**:1153–1165.
- 636 55. **Kreuzer HW, Hill EA, Moran JJ, Bartholomew RA, Yang H, Hegg EL.** 2014.  
637 Contributions of the [NiFe]- and [FeFe]-hydrogenase to H<sub>2</sub> production in *Shewanella*  
638 *oneidensis* MR-1 as revealed by isotope ratio analysis of evolved H<sub>2</sub>. *FEMS Microbiol*  
639 *Lett* **352**:18–24.
- 640 56. **Yazynin SA, Deyev SM, Jucovič M, Hartley RW.** 1996. A plasmid vector with positive  
641 selection and directional cloning based on a conditionally lethal gene. *Gene* **169**:131–132.
- 642 57. **Beja O, Aravind L, Koonin E V., Suzuki MT, Hadd A, Nguyen LP, Jovanovich SB,**  
643 **Gates CM, Feldman RA, Spudich JL, Spudich EN, DeLong EF.** 2000. Bacterial  
644 rhodopsin: Evidence for a new type of phototrophy in the sea. *Science*.  
645
